# Supplementary material for: Tuning of dye optical properties by environmental effects: a QM/MM and experimental study
Source: Royal Society of Chemistry journal article supplement (doi:10.1039/c6cp00841k), 2016-01-01
Supplement: c6cp00841k1.pdf [file c6cp00841k1.pdf]

# Tuning of dye optical properties by environmental effects: a QM/MM and experimental study

## Supporting Information

Gianluca Del Frate,<sup>a</sup> Fabio Bellina,<sup>b</sup> Giordano Mancini,<sup>a</sup> Giulia Marianetti,<sup>a</sup> Pierpaolo Minei,<sup>b</sup> Andrea Pucci<sup>b</sup> and Vincenzo Barone<sup>a\*</sup>

<sup>a</sup> Scuola Normale Superiore, piazza dei Cavalieri 7, I-56126 Pisa, Italy

<sup>b</sup> Dipartimento di Chimica e Chimica Industriale, Università di Pisa, via Moruzzi 13, I-56124 Pisa, Italy

\*e-mail: vincenzo.barone@sns.it

### 1. Force field parameters for the *a* and *b* fluorophores

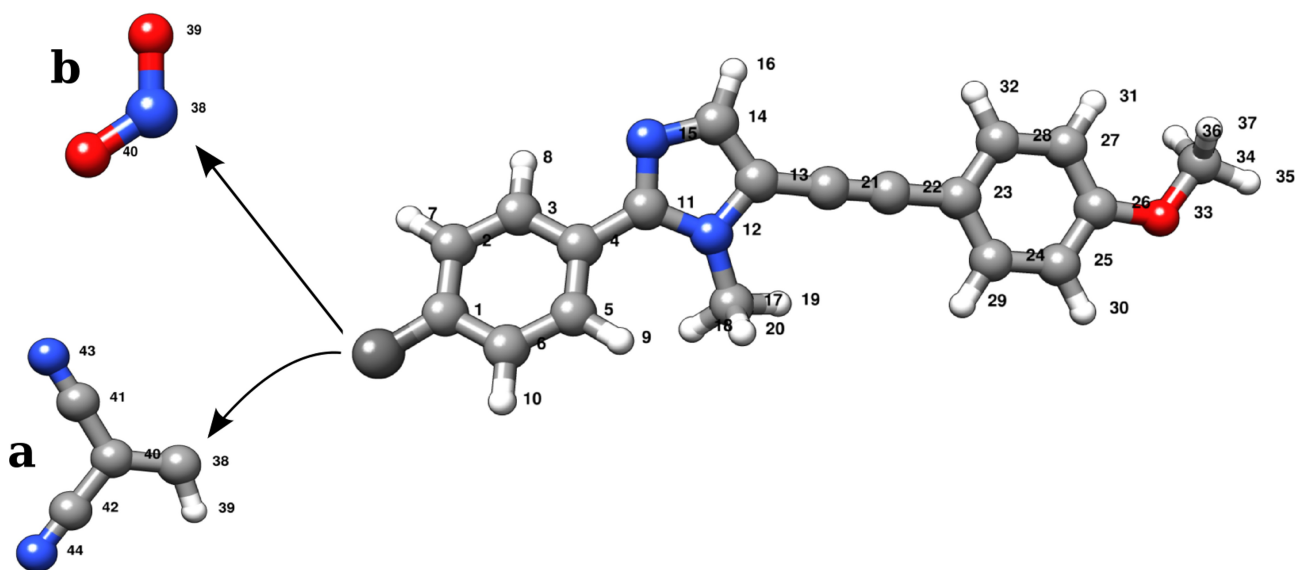

Figure 1 Main scaffold, structures and atom numbers used in the topology files of the two investigated dyes.

| Index | Atom type | CM5 charge | epsilon | sigma   | Index | Atom type | CM5 charge | epsilon | sigma    |
|-------|-----------|------------|---------|---------|-------|-----------|------------|---------|----------|
| 1     | CZ        | -0.014692  | 0.355   | 0.29288 | 26    | CE        | 0.097115   | 0.355   | 0.29288  |
| 2     | CA        | -0.077903  | 0.355   | 0.29288 | 27    | CA        | -0.115905  | 0.355   | 0.29288  |
| 3     | CA        | -0.080194  | 0.355   | 0.29288 | 28    | CA        | -0.085843  | 0.355   | 0.29288  |
| 4     | CI        | 0.016234   | 0.355   | 0.29288 | 29    | HA        | 0.111585   | 0.242   | 0.12552  |
| 5     | CA        | -0.092009  | 0.355   | 0.29288 | 30    | HA        | 0.114977   | 0.242   | 0.12552  |
| 6     | CA        | -0.074794  | 0.355   | 0.29288 | 31    | HA        | 0.112094   | 0.242   | 0.12552  |
| 7     | HA        | 0.111753   | 0.242   | 0.12552 | 32    | HA        | 0.112284   | 0.242   | 0.12552  |
| 8     | HA        | 0.115161   | 0.242   | 0.12552 | 33    | OS        | -0.231589  | 0.029   | 0.58576  |
| 9     | HA        | 0.114037   | 0.242   | 0.12552 | 34    | CT        | -0.12639   | 0.355   | 0.276144 |
| 10    | HA        | 0.117279   | 0.242   | 0.12552 | 35    | HV        | 0.117978   | 0.25    | 0.12552  |
| 11    | CR        | 0.236292   | 0.355   | 0.29288 | 36    | HV        | 0.106994   | 0.25    | 0.12552  |

|    |    |           |       |         |          |    |           |       |         |
|----|----|-----------|-------|---------|----------|----|-----------|-------|---------|
| 12 | NA | -0.278203 | 0.325 | 0.71128 | 37       | HV | 0.106948  | 0.25  | 0.12552 |
| 13 | CW | 0.101919  | 0.355 | 0.29288 | <b>a</b> |    |           |       |         |
| 14 | CV | 0.02153   | 0.355 | 0.29288 |          |    |           |       |         |
| 15 | NB | -0.408453 | 0.325 | 0.71128 |          |    |           |       |         |
| 16 | HY | 0.126081  | 0.242 | 0.12552 |          |    |           |       |         |
| 17 | CM | -0.105589 | 0.355 | 0.76144 |          |    |           |       |         |
| 18 | HC | 0.121021  | 0.25  | 0.12552 |          |    |           |       |         |
| 19 | HC | 0.120628  | 0.25  | 0.12552 |          |    |           |       |         |
| 20 | HC | 0.11887   | 0.25  | 0.12552 |          |    |           |       |         |
| 21 | CK | -0.065676 | 0.33  | 0.87864 |          |    |           |       |         |
| 22 | CK | -0.044361 | 0.33  | 0.87864 |          |    |           |       |         |
| 23 | C! | -0.019544 | 0.355 | 0.29288 | 38       | NO | 0.062924  | 0.325 | 0.50208 |
| 24 | CA | -0.087302 | 0.355 | 0.29288 | 39       | ON | -0.188437 | 0.296 | 0.71128 |
| 25 | CA | -0.107599 | 0.355 | 0.29288 | 40       | ON | -0.186432 | 0.296 | 0.71128 |

**Table 1** Indices, atom types, LJ terms and charges used for **a** and **b**. Indices refer to those reported in Figure 1. In the **a** and **b** sections, only parameters relative to the **a** or the **b** dye respectively are stored.

| Bonds | $b_p^0/\text{nm}$ | $K_p^s/\text{kJ mol}^{-1} \text{nm}^{-2}$ | Bonds    | $b_p^0/\text{nm}$ | $K_p^s/\text{kJ mol}^{-1} \text{nm}^{-2}$ |
|-------|-------------------|-------------------------------------------|----------|-------------------|-------------------------------------------|
| 1 2   | 0.1414            | 315699.207                                | 25 26    | 0.1404            | 347563.214                                |
| 2 3   | 0.1383            | 355365.18                                 | 26 27    | 0.1401            | 347563.214                                |
| 3 4   | 0.1412            | 322199.123                                | 23 28    | 0.1405            | 333025.144                                |
| 4 5   | 0.1407            | 322199.123                                | 27 28    | 0.1393            | 348716.415                                |
| 1 6   | 0.1412            | 315699.207                                | 24 29    | 0.1086            | 336132.25                                 |
| 5 6   | 0.1386            | 355365.18                                 | 25 30    | 0.1086            | 336132.25                                 |
| 2 7   | 0.1083            | 338818.342                                | 27 31    | 0.1083            | 336132.25                                 |
| 3 8   | 0.1084            | 338818.342                                | 28 32    | 0.1086            | 336132.25                                 |
| 5 9   | 0.1083            | 338818.342                                | 26 33    | 0.136             | 332011.511                                |
| 6 10  | 0.1087            | 338818.342                                | 33 34    | 0.1427            | 264301.282                                |
| 4 11  | 0.146             | 320098.726                                | 34 35    | 0.109             | 313438.804                                |
| 11 12 | 0.1376            | 310883.584                                | 34 36    | 0.1096            | 313438.804                                |
| 12 13 | 0.1389            | 309257.087                                | 34 37    | 0.1096            | 313438.804                                |
| 13 14 | 0.1391            | 369872.098                                | <b>a</b> |                   |                                           |
| 11 15 | 0.1337            | 370395.568                                |          |                   |                                           |
| 14 15 | 0.1354            | 332448.31                                 |          |                   |                                           |
| 14 16 | 0.1081            | 346296.187                                |          |                   |                                           |
| 12 17 | 0.1461            | 246654.559                                |          |                   |                                           |
| 17 18 | 0.109             | 318908.58                                 |          |                   |                                           |
| 17 19 | 0.1091            | 318908.58                                 |          |                   |                                           |
| 17 20 | 0.1094            | 318908.58                                 |          |                   |                                           |
| 13 21 | 0.1405            | 406572.33                                 |          |                   |                                           |
| 21 22 | 0.1218            | 872113.995                                |          |                   |                                           |
| 22 23 | 0.1421            | 408943.544                                | <b>b</b> |                   |                                           |
| 23 24 | 0.1412            | 333025.144                                |          |                   |                                           |
| 24 25 | 0.1385            | 348716.415                                |          |                   |                                           |
| 1 38  | 0.1443            | 331364.784                                |          |                   |                                           |
| 38 39 | 0.1088            | 330151.178                                |          |                   |                                           |
| 38 40 | 0.137             | 324566.43                                 |          |                   |                                           |
| 40 41 | 0.1428            | 327488.968                                |          |                   |                                           |
| 40 42 | 0.1428            | 327488.968                                |          |                   |                                           |
| 41 43 | 0.1162            | 1119155.778                               |          |                   |                                           |
| 42 44 | 0.1162            | 1119155.778                               |          |                   |                                           |
| 1 38  | 0.1464            | 154137.162                                |          |                   |                                           |
| 38 39 | 0.1231            | 470490.51                                 |          |                   |                                           |
| 38 40 | 0.1231            | 470490.51                                 |          |                   |                                           |

**Table 2** Fitted stretching parameters.

| Angles | $\theta_p^0/\text{nm}$ | $K_p^b/\text{kJ mol}^{-1} \text{rad}^{-2}$ | Angles   | $\theta_p^0/\text{nm}$ | $K_p^b/\text{kJ mol}^{-1} \text{rad}^{-2}$ |
|--------|------------------------|--------------------------------------------|----------|------------------------|--------------------------------------------|
| 1 2 3  | 120.73                 | 253.9221                                   | 22 23 24 | 120.97                 | 173.8313                                   |
| 2 1 6  | 117.63                 | 193.1521                                   | 22 23 28 | 120.87                 | 173.8313                                   |
| 1 2 7  | 120.67                 | 317.778                                    | 23 24 25 | 120.85                 | 157.5618                                   |
| 2 1 43 | 125.51                 | 335.0622                                   | 24 23 28 | 118.16                 | 126.5979                                   |
| 2 3 4  | 121.43                 | 245.4664                                   | 23 24 29 | 119.46                 | 313.9231                                   |
| 3 2 7  | 118.6                  | 331.085                                    | 24 25 26 | 120.35                 | 222.8489                                   |

|          |        |          |          |        |           |
|----------|--------|----------|----------|--------|-----------|
| 2 3 8    | 119.92 | 331.085  | 25 24 29 | 119.69 | 333.5413  |
| 3 4 5    | 118.05 | 173.1986 | 24 25 30 | 120.86 | 333.5413  |
| 4 3 8    | 118.65 | 334.2055 | 25 26 27 | 119.59 | 211.48    |
| 3 4 11   | 118.12 | 352.7555 | 26 25 30 | 118.79 | 306.2763  |
| 4 5 6    | 120.53 | 245.4664 | 25 26 33 | 115.89 | 309.6693  |
| 4 5 9    | 120.81 | 334.2055 | 26 27 28 | 119.75 | 222.8489  |
| 5 4 11   | 123.8  | 352.7555 | 26 27 31 | 121.13 | 306.2763  |
| 1 6 5    | 121.62 | 253.9221 | 27 26 33 | 124.52 | 309.6693  |
| 1 6 10   | 119.19 | 317.778  | 23 28 27 | 121.3  | 157.5618  |
| 6 1 43   | 116.85 | 335.0622 | 23 28 32 | 119.38 | 313.9231  |
| 6 5 9    | 118.63 | 331.085  | 28 27 31 | 119.13 | 333.5413  |
| 5 6 10   | 119.19 | 331.085  | 27 28 32 | 119.32 | 333.5413  |
| 4 11 12  | 126.64 | 281.2499 | 26 33 34 | 118.63 | 92.5806   |
| 4 11 15  | 122.48 | 236.5187 | 33 34 35 | 105.78 | 508.21    |
| 11 12 13 | 106.84 | 233.2102 | 33 34 36 | 111.15 | 508.21    |
| 12 11 15 | 110.88 | 263.8464 | 33 34 37 | 111.14 | 508.21    |
| 11 12 17 | 129.13 | 223.0908 | 35 34 36 | 109.5  | 321.1039  |
| 12 13 14 | 105.33 | 181.1476 | 35 34 37 | 109.5  | 321.1039  |
| 13 12 17 | 123.78 | 190.9795 | 36 34 37 | 109.68 | 321.1039  |
| 12 13 21 | 123.8  | 228.1906 |          |        |           |
| 13 14 15 | 110.55 | 208.6338 |          |        |           |
| 13 14 16 | 127.02 | 236.8634 |          |        |           |
| 14 13 21 | 130.87 | 229.9816 |          |        |           |
| 11 15 14 | 106.41 | 210.1101 |          |        |           |
| 15 14 16 | 122.43 | 340.9489 |          |        |           |
| 12 17 18 | 109.83 | 477.4827 |          |        |           |
| 12 17 19 | 108.37 | 477.4827 |          |        |           |
| 12 17 20 | 111.24 | 477.4827 |          |        |           |
| 18 17 19 | 108.99 | 328.7599 |          |        |           |
| 18 17 20 | 109.66 | 328.7599 |          |        |           |
| 19 17 20 | 108.7  | 328.7599 |          |        |           |
| 13 21 22 | 178.62 | 141.9975 |          |        |           |
| 21 22 23 | 179.78 | 57.2501  |          |        |           |
|          |        |          | <b>a</b> |        |           |
|          |        |          | 1 38 39  | 114.32 | 489.3336  |
|          |        |          | 1 38 40  | 131.6  | 107.8855  |
|          |        |          | 39 38 40 | 114.08 | 248.6584  |
|          |        |          | 38 40 41 | 119.06 | 167.314   |
|          |        |          | 38 40 42 | 125.76 | 167.314   |
|          |        |          | 41 40 42 | 115.18 | 206.1414  |
|          |        |          | 40 41 43 | 178.44 | 684.4887  |
|          |        |          | 40 42 44 | 179.95 | 684.4887  |
|          |        |          | <b>b</b> |        |           |
|          |        |          | 1 38 39  | 118.2  | 443.4879  |
|          |        |          | 1 38 40  | 118.2  | 443.4879  |
|          |        |          | 39 38 40 | 123.65 | 1110.8395 |

Table 3 Fitted bending parameters.

| Harmonic dihedrals | $\Phi_{\mu}^0/^\circ$ | $K_{\mu}^1/\text{kJ mol}^{-1} \text{rad}^{-2}$ | Harmonic dihedrals | $\Phi_{\mu}^0/^\circ$ | $K_{\mu}^1/\text{kJ mol}^{-1} \text{rad}^{-2}$ |
|--------------------|-----------------------|------------------------------------------------|--------------------|-----------------------|------------------------------------------------|
| 1 2 3 4            | 0                     | 41.625                                         | 17 12 13 21        | 0                     | 147.627                                        |
| 2 3 4 5            | 0                     | 112.976                                        | 21 13 14 16        | 0                     | 91.483                                         |
| 3 4 5 6            | 0                     | 112.976                                        | 23 24 25 26        | 0                     | 100.257                                        |
| 4 5 6 1            | 0                     | 41.625                                         | 24 25 26 27        | 0                     | 81.101                                         |
| 2 1 6 5            | 0                     | 102.567                                        | 25 26 27 28        | 0                     | 81.101                                         |
| 6 1 2 3            | 0                     | 102.567                                        | 26 27 28 23        | 0                     | 100.257                                        |
| 7 2 3 8            | 0                     | 45.925                                         | 24 23 28 27        | 0                     | 92.593                                         |
| 8 3 4 11           | 0                     | 124.124                                        | 28 23 24 25        | 0                     | 92.593                                         |
| 11 4 5 9           | 0                     | 124.124                                        | 22 23 24 29        | 0                     | 113.375                                        |
| 9 5 6 10           | 0                     | 45.925                                         | 29 24 25 30        | 0                     | 41.63                                          |
| 11 12 13 14        | 0                     | 98.884                                         | 30 25 26 33        | 0                     | 118.527                                        |
| 12 13 14 15        | 0                     | 189.666                                        | 33 26 27 31        | 0                     | 118.527                                        |
| 13 14 15 11        | 0                     | 289.976                                        | 31 27 28 32        | 0                     | 41.63                                          |
| 12 11 15 14        | 0                     | 269.018                                        | 22 23 28 32        | 0                     | 113.375                                        |
| 15 11 12 13        | 0                     | 160.815                                        |                    |                       |                                                |
| 4 11 12 17         | 0                     | 8.72                                           |                    |                       |                                                |
|                    |                       |                                                | <b>a</b>           |                       |                                                |
|                    |                       |                                                | 39 38 40 42        | 0                     | 137.51                                         |

Table 4 Fitted rigid torsion parameters.

| Periodic dihedrals | $\gamma_{\mu}^i$ | $K_{\mu}^t/\text{kJ mol}^{-1} \text{rad}^{-2}$ | Periodic dihedrals | $\gamma_{\mu}^i$ | $K_{\mu}^t/\text{kJ mol}^{-1} \text{rad}^{-2}$ |        |
|--------------------|------------------|------------------------------------------------|--------------------|------------------|------------------------------------------------|--------|
| 5 4 11 12          | 1                | 0.365                                          | 26 33 34 35        | 4                | 1.016                                          |        |
|                    | 2                | -7.023                                         |                    | 3                | 2.088                                          |        |
|                    | 3                | 0.195                                          |                    | <b>a</b>         |                                                |        |
|                    | 4                | 3.293                                          |                    |                  |                                                |        |
|                    | 5                | -0.126                                         |                    |                  |                                                |        |
|                    | 6                | 0.203                                          |                    |                  |                                                |        |
| 11 12 17 18        | 3                | -0.405                                         | 2 1 38 39          | 2                | -7.292                                         |        |
|                    | 6                | 0.067                                          |                    | 4                | 1.096                                          |        |
| 27 26 33 34        | 2                | 6.799                                          | <b>b</b>           |                  | 2                                              | -6.413 |
|                    |                  |                                                |                    |                  |                                                |        |

**Table 5** Fitted flexible torsion parameters.

## 2. MD Simulation Analysis of the b fluorophore

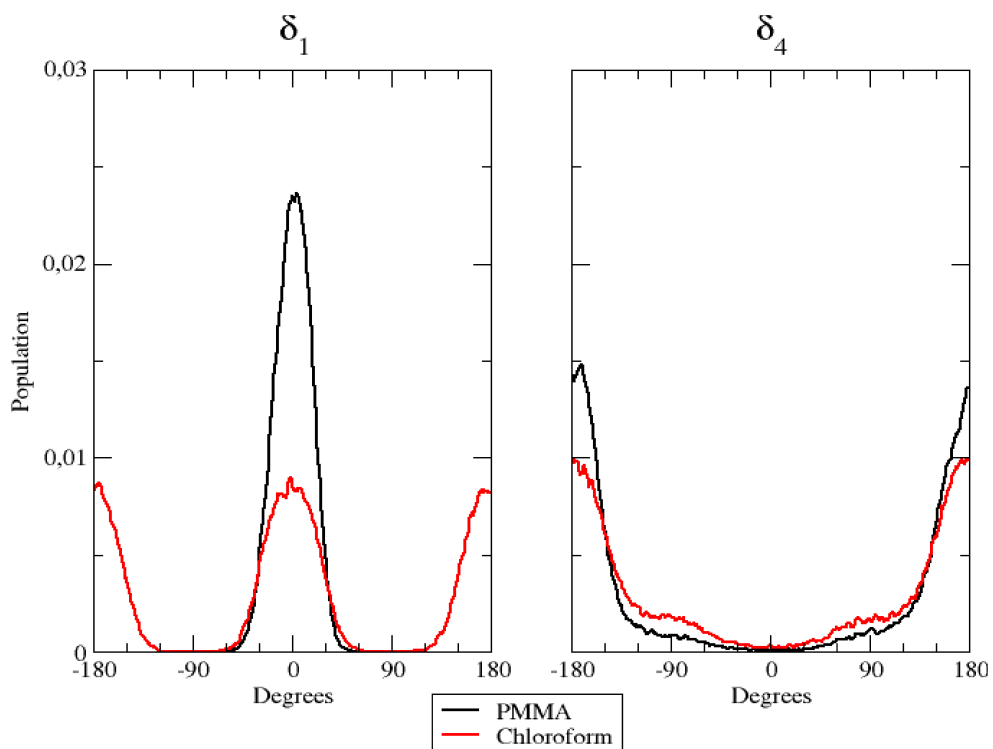

**Figure 2** Population distribution of the  $\delta_1$  (left panel) and  $\delta_4$  (right panel) flexible dihedrals in the two considered environments.

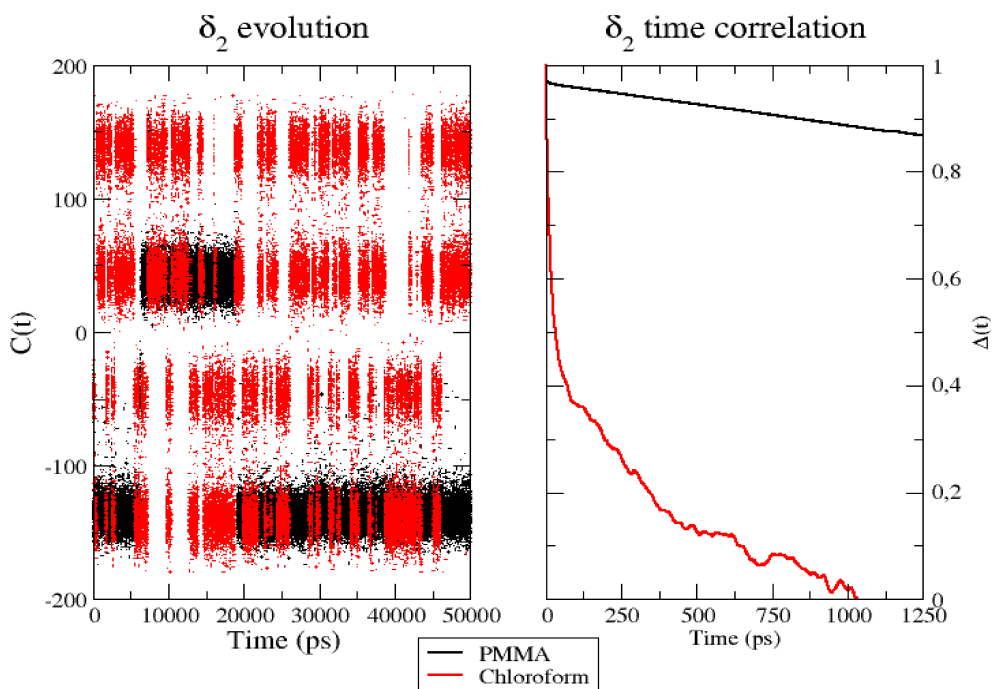

**Figure 3** Population distribution of the  $\delta_2$  dihedral in PMMA matrix (black) and in chloroform solution (red). Right: time correlation of the  $\delta_2$  dihedral in the two considered environments.

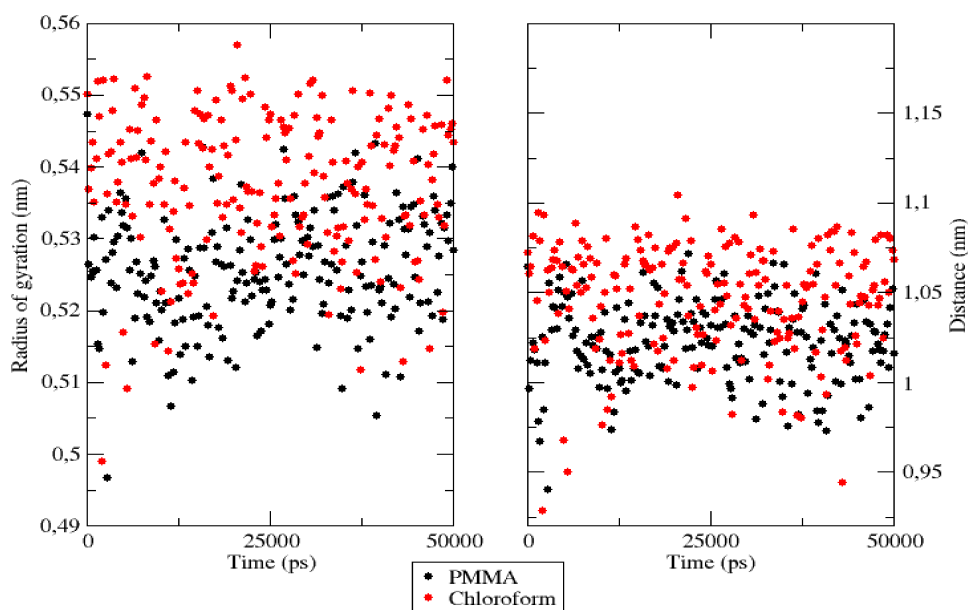

**Figure 4** Left: gyration radius of the investigated dye among the sampled time in the two different simulations. Right: distance evolution between the two phenyl rings.

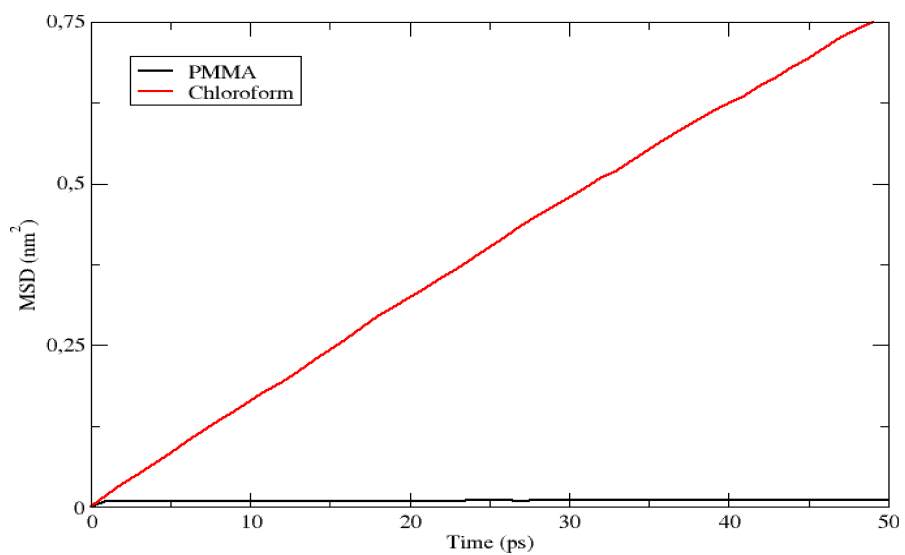

**Figure 5** MSD(t) value computed in chloroform solution and in the PMMA matrix.
